# Supplementary material for: Anti-Extra Domain B Splice Variant of Fibronectin Antibody–Drug Conjugate Eliminates Tumors with Enhanced Efficacy When Combined with Checkpoint Blockade
Source: Oxford University Press journal article supplement (doi:10.1158/1535-7163.mct-22-0099), 2022-07-06
Supplement: mct-22-0099_supplementary_data_suppsd.docx [file mct-22-0099_supplementary_data_suppsd.docx]

**Anti-extra domain B splice variant of fibronectin antibody drug conjugate eliminates tumors with enhanced efficacy when**

**combined with checkpoint blockade**

# Andrea T. Hooper1a, Kimberly Marquette2, Chao-Pei Betty Chang1a, Jonathon Golas1a,

# Sadhana Jain2, My-Hanh Lam1, Magali Guffroy3b, Mauricio Leal2a, Hadi Falahatpisheh3c,

# Divya Mathur1a, Ting Chen2, Kerry Kelleher2, Kiran Khandke1, Elwira Muszynska1,

# Frank Loganzo1a, Edward Rosfjord1d, Judy Lucas1, Zhengyan Kan1, Chakrapani Subramanyam4,

# Christopher O’Donnell4, Dario Neri5, Hans-Peter Gerber1e, Chad May1f, Puja Sapra1d

1 Pfizer Worldwide Research, Development & Medicine, Oncology Research & Development Pearl River, NY, USA & La Jolla, CA, USA

2 Pfizer Worldwide Research, Development & Medicine, BioMedicine Design, Cambridge MA, USA

3 Pfizer Worldwide Research, Development & Medicine, Drug Safety Research & Development, Pearl River, NY, USA

4 Pfizer Worldwide Medicinal Chemistry, Groton, CT, USA

5 Institute of Pharmaceutical Sciences, Department of Chemistry and Applied Biosciences, ETH Zurich, 8093 Zurich, Switzerland.

a Current address: Regeneron Pharmaceuticals, Tarrytown, NY, USA

b Current address: Abbvie, North Chicago, IL, USA

c Current address: Biosplice Therapeutics, San Diego, CA, USA

d Current address: AstraZeneca, New York, NY, USA

e Current address: 3T Biosciences, South San Francisco, CA, USA

f Current address: Maverick Therapeutics, Brisbane, CA, USA

**SUPPLEMENTARY MATERIALS INCLUDED IN THIS DOCUMENT**

1. Materials & Methods
2. Tables
3. Figures

**SUPPLEMENTARY MATERIALS & METHODS**

***EDB+FN immunohistochemistry (IHC) on normal and tumor tissues***

8 µm sections were brought to room temperature (RT), fixed for 4 minutes (min) in 3:1 acetone:100% ethanol, dipped in 10% neutral buffered formalin (NBF, ThermoScientific) for 20 seconds (sec), and rinsed in TBS.  Endogenous peroxidase activity was inactivated with Peroxidazed 1 (Biocare Medical) for 10 min. Non-specific protein interactions were blocked for 10 min with Background Punisher (Biocare Medical). Anti-human EDB+FN L19 antibody or isotype control (human mAb 8.8; Pfizer) was pre-complexed with rabbit anti-human IgG (Jackson ImmunoResearch) at 3 µg/ml and 0.5 µg/ml, respectively, for 1 hour (h) at RT, and then mixed with whole human IgG (Jackson ImmunoResearch) at 595 µg/ml for 15 min at RT.  After incubating sections with the precomplex for 1 h, washing in TBS, and incubating with SignalStain Boost Rabbit HRP (Cell Signaling Technology) for 30 min, signal was developed with DAB+ (Dako) for 5 min and counterstained with hematoxylin prior to coverslipping. All staining was analyzed by a pathologist.

***EDB+FN Surface Plasmon Resonance***

cDNA encoding human fibronectin EDB domain flanked by domain 7 on the amino terminus and domains 8 and 9 at the carboxy terminus of the EDB domain (7-EDB-89) with a HIS-6 purification tag was cloned into pSMED2 expression vector. Transient transfection of pSMED2_7-EDB-89 plasmid was performed using the Expi293™ Expression System (Invitrogen) per the manufacturer’s suggested protocol. The resultant conditioned medium was purified using a Ni Sepharose High Performance column, followed by HiLoad Superdex 200 16/60 column and then buffer exchanged into PBS-CMF pH 7.2. For evaluation of kinetic rate constants to determine 1:1 binding affinity, anti-human IgG antibody (GE Healthcare, BR-1008-39) was covalently amine coupled onto all flow cells of a CM5 carboxymethylated dextran coated sensor chip to a density of about 10,000 resonance units (RU) following the manufacturer’s protocol and EDB antibodies were captured to a level of approximately 60-90 RUs. Next, 7-EDB-89 protein ranging in concentration from 11.1 - 600 nM was injected over the surface and the surface was regenerated with an ionic regeneration buffer (0.46 M KSCN, 1.83 M MgCl2, 0.92 M urea, and 1.83 M guanidine-HCl pH 7.4) followed by equilibration with 0.01 M HEPES pH 7.4, 0.15 M NaCl, 3 mM EDTA, 0.05% v/v Surfactant P20 (HBS-EP+, GE Healthcare).

An alternate method was used to evaluate the potential effect of avidity on the off-rate and affinity (KD) values for the anti-EDB+FN antibodies by varying densities of directly immobilized human 7-EDB-8-9 protein. 7-EDB-89 was covalently amine coupled onto an active flow cell of a CM5 sensor chip to a density of approximately 650 RU to represent a high-density surface, 90 RU for a medium-density surface and 50 RU for low-density surface. Anti-EDB+FN antibody ranging from 0.074 - 6 nM was injected over the immobilized 7-EDB-89 and regenerated with an ionic regeneration buffer followed by equilibration with HBS-EP+. To confirm avidity, binding affinities were determined using the anti-EDB+FN antigen-binding fragment (Fab) as the analyte ranging from 0.22 – 6 nM to human 7-EDB-89 that was covalently amine coupled onto an active flow cell of a CM5 sensor chip at a high density (500 RU).

All Surface Plasmon Resonance (SPR) assays were performed at 25°C with a data collection rate of 1Hz using a Biacore T200 instrument (GE Healthcare). The resulting sensorgrams were double referenced using both a control surface and buffer injections. The rate constants were determined by fitting the data to a 1:1 Langmuir model with Biacore T200 evaluation software v2.0 and the equation KD=kd/ka.

***In vitro Cytotoxicity***

WI-38 VA-13 subline 2RA (ATCC, CCL-75.1) was maintained in MEM (Corning), with 10% FBS, 1% MEM non-essential amino acids, 1% sodium pyruvate (1mM), 100 units/ml penicillin-streptomycin, and 1% GlutaMax or 2 mM L-glutamine. HT-29 (ATCC, HTB38) were maintained in DMEM with 10% FBS, 100 units/ml penicillin-streptomycin, and 2mM L-glutamine. Proliferating WI-38 VA-13 or HT-29 cells were harvested from culture flasks with non-enzymatic cell dissociation buffer (Gibco) and cultured overnight in 96-well plates (Corning) at 1000 or 1100 cells/well, respectively, in a humidified chamber (37ºC, 5% CO2). The next day, cells were treated with ADCs in duplicate in 10-point dilution curve from 2 ng/ml to 40 mg/ml in 150 µl/well, and incubated at 37°C, 5% CO2 for 4 days (d), after which 50 µl of CellTiter-Glo reagent (Promega) was added to the cells and incubated 30 min at RT. Luminescence was measured on a Victor plate reader (Perkin Elmer). Relative cell viability was determined as a percentage of untreated control wells. IC50 values were calculated using four-parameter logistic model #203 with XLfit v4.2 (IDBS).

***Histology & IHC for mechanism of action & pharmacodynamic biomarkers***

Human xenograft tumors were collected 48 h after a single 3 mg/kg dose of EDB-ADC or Neg-ADC. For the syngeneic tumor model EMT-6, tumors were collected 48 h after the 2nd dose of 3 mg/kg rcEDB-ADC.Following whole body PBS perfusion, tumors were removed and fixed in 10% NBF for 48 h. Fixed samples were processed in an automated tissue processor (Sakura Tissue-Tek VIP) and embedded in paraffin. For hematoxylin and eosin (H&E) staining, 5 µM sections were placed in CAT hematoxylin (Biocare Medical) for 1 min, blued in tap water, differentiated with 80% reagent alcohol, incubated in Edgar Degas Eosin (Biocare Medical) for 90 sec, dehydrated in 95% then 100% reagent alcohol, cleared in xylene and coverslipped. For IHC, antigens were retrieved in a pressure cooker (Retriever2100; Electron Microscopy Sciences) using 10 mM Citrate buffer pH 6.0 (Invitrogen) for phospho-Histone H3, or Borg Decloaker buffer pH 9.5 (Biocare Medical) for anti-human IgG, anti-auristatin (Aur0101), anti-CD3 and anti-PD-L1. Endogenous peroxidase activity and non-specific protein interactions were blocked as above.  Tissue sections were incubated with rabbit anti-human Pan IgG (Epitomics), mouse anti-auristatin (Pfizer), rabbit anti-phospho Histone H3 (Cell Signaling Technology), rabbit anti-CD3 (Abcam) and rabbit anti-PD-L1 (Sino Biological) for 1 h at RT. Mouse anti-Aur0101 antibody was conjugated to AlexaFluor 488 using Alexa Fluor 488 protein labeling kit (ThermoFisher). AlexaFluor 488 labeled anti-Aur0101 antibody was detected with rabbit anti-AlexaFluor488 (ThermoFisher) for 45 min at RT.  Rabbit antibodies were detected with SignalStain Boost HRP IHC Detection reagent for 30 min at RT.  Signal was developed in DAB+ and counterstained in hematoxylin prior to coverslipping.Stained slides were scanned at 20x on the Aperio AT2 slide scanner (Leica, Wetzlar, Germany). The images were then captured using the Aperio ImageScope v12.0.1.5039.

For digital image analyses of EMT6 tumors, images were analyzed using custom algorithms created using Definiens Tissue Studio that were optimized for each individual marker of interest. The tissue sections were electronically segmented into regions corresponding to viable tumor, necrosis, other (tissue folds etc.) and white space. Only regions of viable tumor were evaluated for CD3 positive cells. Positive cells were identified using a hard threshold on the intensity of the CD3 IHC marker. Data are presented as the % positivity and positive cell density (positive cells per tissue area). Positive Cell Density was calculated using the following equation: cells/mm2 = (No. Positive Cells/Viable Tumor area (mm2)) * 1 x 106. Positivity (% positive cells) was calculated using the following equation: Positivity = No. Positive Cells/Total No. Cells (includes immune, stromal and tumor cells) x100. Data were prepared in Microsoft Excel to calculate average, standard deviation and standard error and were graphed and analyzed for statistical significance using unpaired t test in Graphpad Prism v 6.03.

***Cynomolgus safety and pharmacokinetic study design***

Male and female cynomolgus monkeys of Mauritius origin, 4 to 5 years of age at dosing initiation, were administered either the vehicle control article or EDC-ADC at 6 or 12 mg/kg (N=1/sex/group) by intravenous bolus injection once on Days 1, 22, and 42.  Parameters evaluated at various time points during the study included clinical signs, body weight, food consumption, and clinical pathology. Blood samples for plasma bioanalysis (total Ab and ADC) were taken on Days 1 and 22 at pre-dose (Day 1 only), 0.083, 4, 24, 72, 120, 168, 336, 480 (Day 22 only) and 504 (Day 1 only) hours post-dose.  Animals were necropsied 3 days after the last dose, on Day 45. Tissues were collected, and macroscopic and microscopic examinations were performed.

Plasma sample analysis was done using the GyroLab system with biotinylated sheep anti-hIgG as the capture agent for the total antibody and ADC assays, adsorbed on a microtiter plate. Detection of the total Ab used Alexa Fluor 647 goat anti-human IgG and detection of the ADC used Alexa Fluor 647 anti-0101 mAb reagents. Sample concentrations are determined by interpolation from a standard curve that is fit using a 4-parameter logistic regression model with a weighting factor of 1 in the Watson Laboratory Information Management System (LIMS). The lower limit of quantitation (LLOQ) was 0.100 µg/mL serum. All toxicokinetic parameters were determined from individual animal data using the pharmacokinetics module within Watson LIMS (version 7.4, Thermo, Inc., Philadelphia, PA). The area under the serum concentration time curve AUC was estimated using the linear trapezoidal. A concentration of 0 μg /mL was used for LLOQ values. The therapeutic index (TI = Cavg/TSC) value was calculated based on the ratio of the average ADC concentration at the HNSTD dose over the tumor stasis concentration (minimum inhibitory concentration or tumor static concentration, used as an index of efficacy) in the relevant mouse models (H1975, PDX-NSX-11122 and PDX-NSX-24112).  The TSC, a PK/PD derived parameter combines the growth pattern information and the drug effect providing insight into the efficacy of the ADC, can be used for translation by extrapolating xenograft data to the clinic (Haddish-Berhane et al 2013).

**SUPPLEMENTARY TABLES**

**Supplementary Table 1. Binding characteristics of EDB-ADC by surface plasmon resonance**

| **SPR Method** | **Assay Orientation** | | **L19 Anti-EDB Antibody or Fab Variant, KD** | |
| --- | --- | --- | --- | --- |
| **Ligand** | **Analyte** | **L19** | **L19-K(H94)R-K(H290)C-κK(L183)C** |
| Direct Binding | **High** density EDB directly immobilized on surface | L19 IgG | 43.1 ± 6.08 pM | ND |
| Direct Binding | **Medium** density EDB directly immobilized on surface | L19 IgG | 182.5 ± 21.9 pM | ND |
| Direct Binding | **Low** density EDB directly immobilized on surface | L19 IgG | 414.5 ± 201.5 pM | ND |
| Direct Binding | L19 IgG immobilized via anti-hFc capture | EDB | 231 ± 1.4 nM | 223.0 ± 4.2 nM |
| Direct Binding | Immobilize EDB directly on surface | L19 Fab | 21.3 ± 0.64 nM | 39.5 ± 7.4 nM |

CM5 = carboxymethylated dextran biosensor chip; EDB = recombinant human 7-EDB-89 protein; Fab = fragment antigen-binding; Fc = fragment crystallizable; IgG = immunoglobulin G; ND = not determined.; SPR = surface plasmon resonance

**Supplementary Table 2. Site-specific and conventionally conjugated EDB-ADCs binding to human 7-EDB-89 protein as determined by ELISA**

| **ADC** | **EC50 (nM)** |
| --- | --- |
| EDB-ADC | 0.05 |
| Conventionally conjugated EDB-ADC | 0.05 |

**Supplementary Table 3. In vitro potency (cell cytotoxicity) of site-specific and conventionally conjugated EDB-ADCs in EDB+FN positive and negative cell lines**

| **ADC** | **IC50 ng/ml**  **Mean ± SD (number of assays)** | |
| --- | --- | --- |
| **WI-38 VA-13**  **EDB+FN positive** | **HT-29**  **EDB+FN negative** |
| EDB-ADC | 216 ± 94 (6) | >10,000 (3) |
| Conventionally conjugated EDB-ADC | 185 ± 142 (23) | >10,000 (5) |

**Supplementary Table 4. Homology at the amino acid level of EDB and the flanking domains between human, cynomolgus monkey and mouse**

| **FN Domain (s)** | **Sequence Identity (AA)** | |
| --- | --- | --- |
| Human versus  Cynomolgus Monkey | Human versus Mouse |
| 7-EDB-89 | 98% | 92% |
| 7 | 95% | 91% |
| EDB | 100% | 100% |
| 8 | 100% | 95% |
| 9 | 97% | 83% |

7-EDB-8-9 = extra-domain B containing fibronectin (EDB+FN) flanked by domain 7 on the amino terminus and domains 8 and 9 at the carboxy terminus of the EDB domain recombinant protein; AA: Amino acid; EDB: extra domain B of fibronectin 1. FN1: Fibronectin 1

**Supplementary Table 5. Anti-EDB+FN antibodies bind human and cynomolgus monkey EDB+FN with comparable affinity by surface plasmon resonance**

| **7-EDB-89** | **Anti-EDB+FN IgG** | | | **Anti-EDB+FN-K(94)R-IgG** | | | **Anti-EDB+FN IgG-K290C+K183C** | | |
| --- | --- | --- | --- | --- | --- | --- | --- | --- | --- |
| **ka**  **(1/Ms)** | **kd**  **(1/s)** | **KD**  **(nM)** | **ka**  **(1/Ms)** | **kd**  **(1/s)** | **KD**  **(nM)** | **ka**  **(1/Ms)** | **kd**  **(1/s)** | **KD**  **(nM)** |
| **Human** | 6.15  E+05 | 9.75  E-02 | 159 | 6.11  E+05 | 1.11  E-01 | 182 | 6.64  E+05 | 9.94  E-02 | 150 |
| **Cynomolgus Monkey** | 5.60  E+05 | 1.05  E-01 | 188 | 5.52  E+05 | 1.19  E-01 | 216 | 6.12  E+05 | 1.10  E-01 | 179 |

7-EDB-8-9 = extra-domain B containing fibronectin (EDB+FN) flanked by domain 7 on the amino terminus and domains 8 and 9 at the carboxy terminus of the EDB domain recombinant protein; ka = association rate constant; kd = dissociation rate constant; KD = equilibrium dissociation constant obtained from kinetics analysis ratio of the rate constants ka and kd.

**Supplementary Table 6. Derived tumor static concentration values for xenograft models and therapeutic index (TI)**

| **ADC** | **HNSTD** | **Parameter** | **NSX-24112** | **H1975** | **NSX-11222** |
| --- | --- | --- | --- | --- | --- |
| **EDB-ADC** | ≥ 12 mg/kg | TSC  µg/ml | 12.1  (11, 13.2) | 5.4  (4.8, 6.2) | 3.2  (2.3, 4.4) |
| TI  (NHP) | 4 | 9 | 16 |
| **Conventionally conjugated**  **EDB-ADC** | ≥ 5 mg/kg | TSC  µg/ml | ND | 4.7  (4.2, 5.2) | 1.9  (1.7, 2.2) |
| TI  (NHP) | ND | 2 | 4.9 |

NHP = non-human primate; TI = therapeutic index; TSC = tumor static concentration

**Supplementary Figure 1.** EDB mRNA is highly expressed in tumors vs normal tissues. (A) Expression of EDB mRNA in The Cancer Genome Atlas (TCGA) tumor database vs normal adjacent tissues and as compared to normal tissues from the GTEX database. (B) EDB mRNA expression across human cancers from the TCGA database shows widespread expression at high levels across a wide variety of human tumor types. Definitions of the abbreviations used to describe each tumor type can be found at the following link: <https://gdc.cancer.gov/resources-tcga-users/tcga-code-tables/tcga-study-abbreviations>


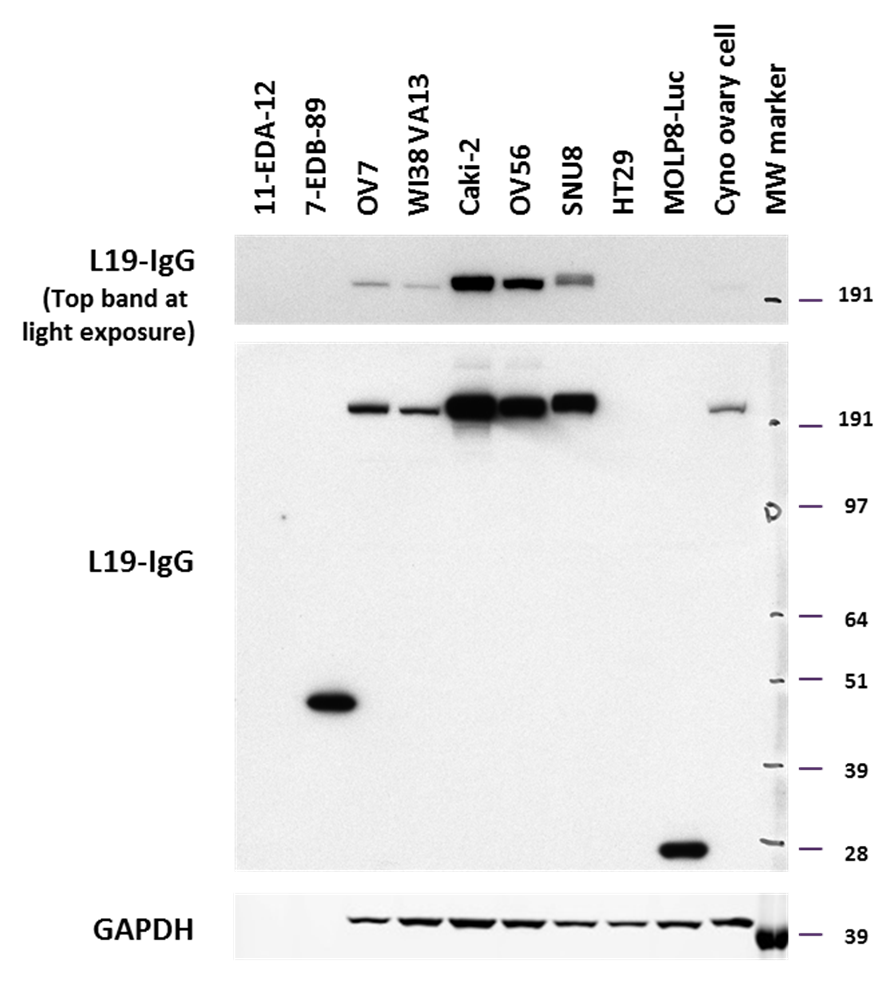


**Supplementary Figure 2**. EDB+FN expression profiled by western blotting with anti-EDB+FN antibody clone L19 in a panel of human cell lines. Additional lanes include recombinant human 11-EDA-12, 7-EDB-89 and cynomolgus monkey ovary. Two exposures of L19 blotting are shown. GAPDH was used as a loading control.


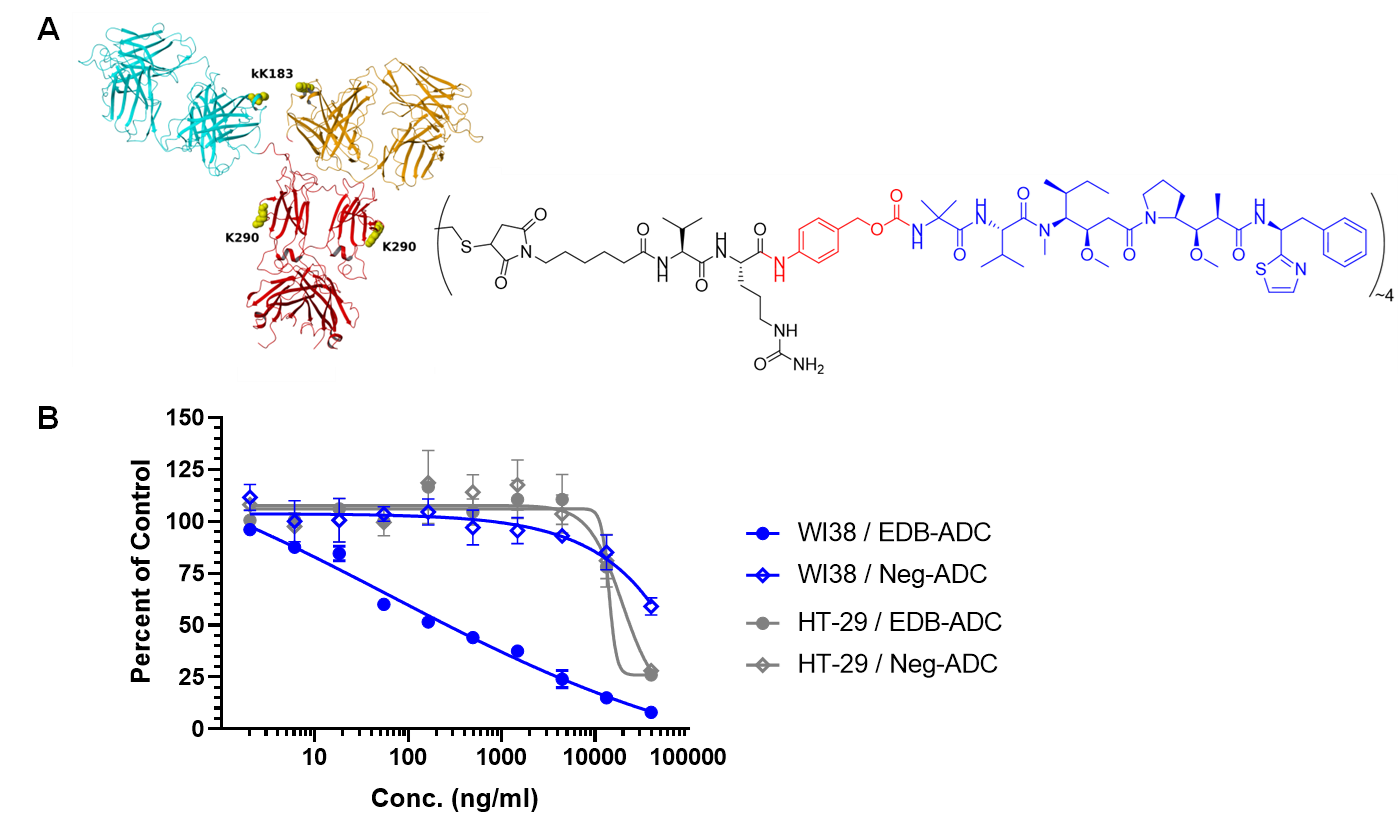


**Supplementary Figure 3. EDB-ADC induces potent cytotoxicity in EDB+FN-expressing cells in vitro.** (A) Schematic of EDB-ADC, showing site-specific conjugation of linker-payload mcValCitPABC_Aur0101 (vc0101) to EDB-antibody via engineered cysteine sites kK183C and K290C. (B) In vitro cytotoxicity profile of EDB-ADC and negative control ADCs, both conjugated with vc0101 at kK183C-K290C, in cultured WI-38 VA-13 or HT29 cell lines. WI-38 VA-13 are transformed fibroblast cells which secrete EDB+FN. HT-29 cells are negative for EDB+FN.

**Supplementary Figure 4.** Quantitation of CD3 Positive T-cell Infiltration in EMT6 After rcEDB-ADC Treatment. Electronically segmented viable tumor regions from EMT6 tumors 48 hours after the 2nd dose (Q4Dx2) of either vehicle or 3 mg/kg EDB-rcADC were evaluated for CD3 positive cells. Data are presented as (a) positive cell density (positive cells per tissue area, cells/mm2), and (B) % positivity SEM.

**Supplementary Figure 5.** EDB+FN protein expression in cynomolgus normal tissues as assessed by IHC. EDB+FN expression in cynomolgus (A) Heart, (B) Kidney, (C) Liver, (D) Lung, (E) Small Intestine (muscularis mucosae), (F) Small Intestine (muscularis externa), (G) Adrenal, (H) Pancreas, (I) Skin, (J) Urinary Bladder (muscularis mucosae), (K) Urinary Bladder (muscularis externa), (L) Ovary (theca externa). Micron bar = 300 µm.

**Supplementary Figure 6.** Individual ADC blood concentration profiles of EDB-ADC in non-human primates. Note the ADA positive animal (#2M) at 6 mg/kg.
